# Supplementary material for: An ADAMTSL2 Founder Mutation Causes Musladin-Lueke Syndrome, a Heritable Disorder of Beagle Dogs, Featuring Stiff Skin and Joint Contractures
Source: PLoS One. 2010 Sep 17;5(9):e12817. doi: 10.1371/journal.pone.0012817 (PMC2941456; doi:10.1371/journal.pone.0012817)
Supplement: Table S2 — De novo microsatellites used for fine-mapping analysis. (0.02 MB XLS) [file pone.0012817.s003.xls]

## Sheet: Fine-Mapping Loci - Table 1
Table S2. de novo microsatellites used for fine-mapping analysis.
Locus	CFA 9 Position (bp)	Forward Primer	Reverse Primer	Boxer Size (bp)	Allele Size Range (bp)	No. Alleles	HET
09_048A_CA	48141889	ggagtgggaagggaaaatcc	caaacattgcccagtcagga	174	178 - 205	11	0.447
09_048D_CA	48391505	gctgcctcccaaaatacatga	tgccaaacatggctctctgt	335	353 - 363	7	0.417
09_048E_CA	48554585	tgggagtgtgttgtttccaa	ccatatcaagcaaaatgctcct	400	414 - 423	5	0.158
09_048F_CA	48600374	gctgtgacatctgccctgag	gatggaaaccaccccttgaa	369	387 - 399	7	0.489
09_049A_CA	49024514	gccttgggtctgtccagttc	tgaccagggtgagaccttcc	392	418 - 432	8	0.498
09_049B_CA	49297607	gtgggcctgcagtgaacata	gaatttgcagggatgatccag	390	407 - 421	5	0.522
09_050A_CA	50058790	atggtgggtgggcttaatga	ggacttctggggcaagagtg	356	366 - 384	5	0.465
09_050B_CA	50115532	aagctggccagaggtcatgt	ccctgaggttcccttcaatg	351	374 - 385	6	0.56
09_050C_CA	50257127	ttgtaggagggcatgtgcag	gggggacagcattcagctac	218	237 - 256	10	0.556
09_050D_CA	50485057	cattctcttgcctggccttt	cctgttctgatccaccatgc	365	375 - 397	11	0.643
09_050E_CA	50697513	gcaagtggcagcactgtttc	agcatccagtggaggtggag	385	377 - 417	9	0.449
09_051A_CA	51097830	agcctgaaggttggtggtgt	tttgccaacaccttgaccac	333	350 - 362	7	0.696
09_051B_CA	51141571	gaagtcaggcacttggtgga	tgaagcagcaaatggacacc	380	393 - 415	10	0.566
09_051C_CA	51414926	cacaggtgcagtcgctctct	ttccctcaggaagacactgg	390	404 - 411	4	0.51
09_052A_CA	52148866	tgggatgcagccagatacac	gtcccaacgatgtggtctca	391	414 - 420	5	0.62
09_053B_CA	53743881	cctcccagaccaggtgtagc	tgcagcaaatctgtgacctg	319	344 - 362	8	0.362
09_053D_CA	53898905	tgcctcccttttctttccaa	ttgtatgcacccccatgtgt	102	110 - 131	8	0.665
09_054A_CA	54171045	ccgtgggagagaaggtgact	aattgaccatgaggggaacg	337	361 - 379	10	0.69
09_054B_CA	54264215	agcgactgacatccatcacc	ctggtctcggtcatggtcaa	247	266 - 276	5	0.264
09_054C_CA	54483853	tgtgccttcatgtttctgtgaa	cacctgctgcctgaagtgtc	147	162 - 179	7	0.654
09_054E_CA	54551334	cacttccaccctggctcttc	tgggtcctgacctacccatc	364	367 - 397	10	0.631
09_054F_CA	54617987	ccacaaggcatgtttcactg	ccagggagtcgaccatgaac	375	385 - 418	12	0.515
09_054G_CA	54878657	ggtacagtgcttgggggaac	gcgaagcgcataaaacacac	337	355 - 361	4	0.378
