# Supplementary material for: An ADAMTSL2 Founder Mutation Causes Musladin-Lueke Syndrome, a Heritable Disorder of Beagle Dogs, Featuring Stiff Skin and Joint Contractures
Source: PLoS One. 2010 Sep 17;5(9):e12817. doi: 10.1371/journal.pone.0012817 (PMC2941456; doi:10.1371/journal.pone.0012817)
Supplement: Table S3 — Results of fine-mapping by case-control association with de novo markers. (0.01 MB XLS) [file pone.0012817.s004.xls]

## Sheet: Fine Structure - Table 1 - Tabl
Table S3. Results of fine-mapping by case-control association with de novo markers.
LocusA	CFA9 Position (Mb)	Fisher p-value	ZMAX p-value	Aberrant Genotype	-log (p-value)B
09_048A_CA	48141889	0.181964	0.299132	184-184	0.524137
09_048D_CA	48391505	0.0616908	0.140671	353-360	0.851797
09_048E_CA	48554585	0.0011	0.0033343	414-420	2.477
09_048F_CA	48600374	0.127235	0.0086161	393-393	2.06469
09_049A_CA	49024514	0.0026323	0.0002086	418-418	3.68069
09_049B_CA	49297607	0.0024742	0.0012778	416-416	2.89354
09_050A_CA	50058790	2.07e-05	1.7e-06	373-373	5.76955
09_050B_CA	50115532	0	1e-07	385-385	7
09_050C_CA	50257127	0	1e-07	254-254	7
09_050D_CA	50485057	0	1e-07	383-383	7
09_050E_CA	50697513	0	1e-07	411-411	7
09_051A_CA	51097830	0	1e-07	356-356	7
09_051B_CA	51141571	5.8e-06	1e-07	403-403	7
09_051C_CA	51414926	5.8e-06	1e-07	407-407	5.1
09_052A_CA	52148866	5.8e-06	1e-07	418-418	7
09_053B_CA	53743881	0.278545	0.058937	358-358	1.22961
09_053D_CA	53898905	0	1e-07	129-129	7
09_054A_CA	54171045	0	1e-07	369-369	7
09_054B_CA	54264215	0	1e-07	273-273	7
09_054C_CA	54483853	0.0046756	1.44e-05	162-162	4.84164
09_054E_CA	54551334	0.0323725	4e-07	393-393	6.39794
09_054F_CA	54617987	0.0220146	0.0003037	415-415	3.51756
09_054G_CA	54878657	0.568608	0.52083	361-361	0.283304
A Allelic associations among markers in blue were perfect among affected dogs.
B P-values shown in red saturated at 10-7 for statistical significance with 10,000,000 permutations.
